# Supplementary material for: Point-of-care creatinine testing for kidney function measurement prior to contrast-enhanced diagnostic imaging: evaluation of the performance of three systems for clinical utility
Source: publisher site journal article supplement (doi:10.1515/cclm-2018-0128), 2018-04-19
Supplement: Supplementary file 1 [file BEPoCC Abbreviations.docx]

**Abbreviations:**

AKI – acute kidney injury

CI-AKI – contrast induced acute kidney injury

CKD – chronic kidney disease

PoC – point of care

eGFR – estimated glomerular filtration rate

SCr – serum creatinine

IV – intravenous

U&E – urea and electrolytes

QC – quality control

WBCr – whole blood creatinine

CKD-EPI – chronic kidney disease epidemiology collaboration

MDRD – modification of diet in renal disease

CV – coefficient of variation

CLSI – Clinical and Laboratory Standards Institute

NKDEP – National Kidney Disease Education Program

SD – standard deviation
