# Supplementary material for: Point-of-care creatinine testing for kidney function measurement prior to contrast-enhanced diagnostic imaging: evaluation of the performance of three systems for clinical utility
Source: publisher site journal article supplement (doi:10.1515/cclm-2018-0128), 2018-04-19

Supplementary figure 2(A) Scatter diagram of the difference versus the means of paired creatinine results analysed with the i-STAT and reference method creatinine.


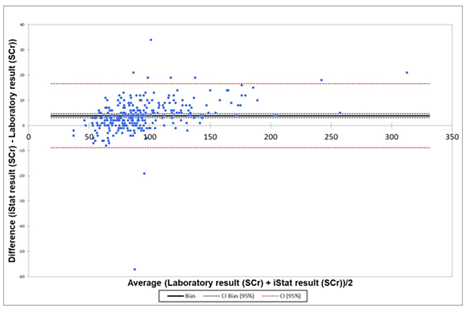

Supplement: Supplementary file 3 [file Supp Fig 2a.docx]
