# Supplementary material for: Point-of-care creatinine testing for kidney function measurement prior to contrast-enhanced diagnostic imaging: evaluation of the performance of three systems for clinical utility
Source: publisher site journal article supplement (doi:10.1515/cclm-2018-0128), 2018-04-19

Supplementary figure 2(B) Scatter diagram mapping the creatinine results from the i-STAT to the laboratory measurements, with Passing-Bablok line and equation


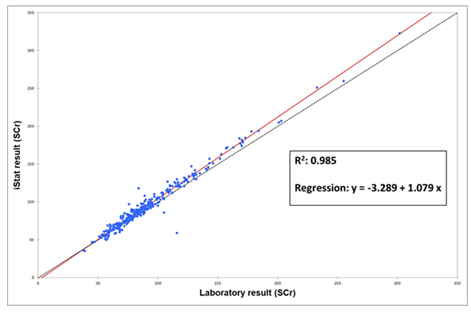

Supplement: Supplementary file 4 [file Supp Fig 2b.docx]
