# Supplementary material for: Point-of-care creatinine testing for kidney function measurement prior to contrast-enhanced diagnostic imaging: evaluation of the performance of three systems for clinical utility
Source: publisher site journal article supplement (doi:10.1515/cclm-2018-0128), 2018-04-19

Supplementary figure 4(B) Scatter diagram mapping the creatinine results from the ABL800 FLEX to the laboratory measurements, with Passing-Bablok line and equation


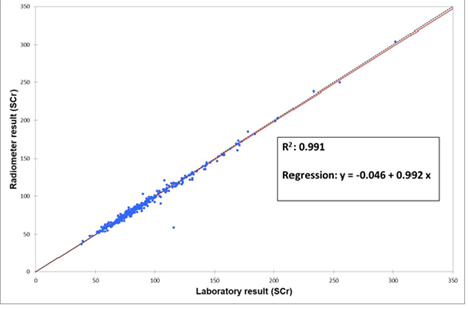

Supplement: Supplementary file 8 [file Supp Fig 4b.docx]
