# Supplementary figures and images for: Point-of-care creatinine testing for kidney function measurement prior to contrast-enhanced diagnostic imaging: evaluation of the performance of three systems for clinical utility
Source: publisher site journal article supplement (doi:10.1515/cclm-2018-0128), 2018-04-19

Supplementary figure 1: Recruitment flow chart


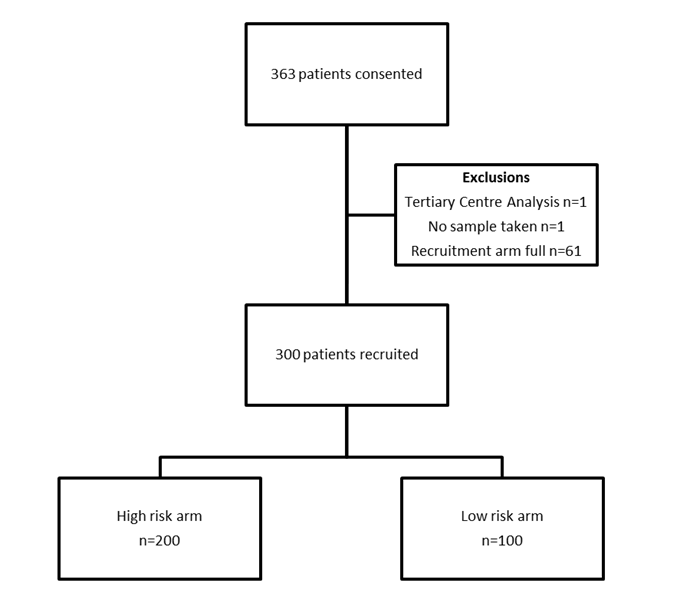

Supplement: Supplementary file 2 [file Supp Fig 1.docx]
